# Supplementary material for: Deletion of Lkb1 in adult mice results in body weight reduction and lethality
Source: PubMed Central journal article supplement (PMC5099919; doi:10.1038/srep36561), 2016-11-08
Supplement: srep36561-s1.pdf [file srep36561-s1.pdf]

## **Deletion of Lkb1 in adult mice results in body weight reduction and lethality**

Tizhong Shan<sup>1\*</sup>, Yan Xiong<sup>2</sup>, Shihuan Kuang<sup>2,3\*</sup>

<sup>1</sup> College of Animal Sciences, Zhejiang University, Hangzhou, 310058, China

<sup>2</sup> Department of Animal Sciences, Purdue University, West Lafayette, IN 47907,  
USA

<sup>3</sup> Purdue University Center for Cancer Research, West Lafayette, IN 47907, USA

### **\*Correspondence:**

Tizhong Shan, Ph.D., Professor

866 Yuhangtang Road, Hangzhou, China

Phone: +86-0571-88982102

Email: tzshan@zju.edu.cn

Shihuan Kuang, Ph. D., Associate Professor

174B Smith Hall,

901 West State Street,

West Lafayette, IN 47907, USA

Phone: 765-494-8283

Fax: 765-494-6816

Email: skuang@purdue.edu

**Running title:** Global Lkb1 knockout in adult mice

## Supplemental figures

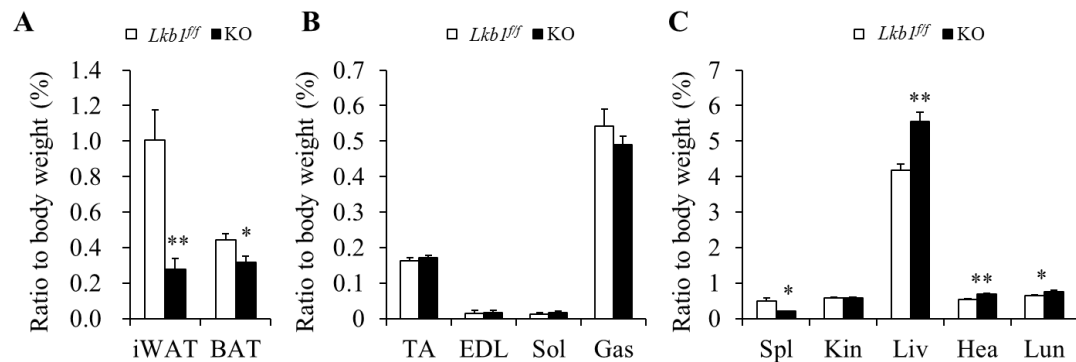

### Supplemental Figure 1: The effect of global deletion of *Lkb1* on the ratios of

**different tissues to body weight. (A-C)** The ratios of adipose (A), muscle (B) and

organs (C) to body weight of normal diet fed *Lkb1<sup>flox/flox</sup>* (*Lkb1<sup>flox/flox</sup>*, n=6) and *Rosa-Lkb1* (KO, n=9) mice at 3 weeks after tamoxifen (TMX) induction. Error bars:

S.E.M., \*  $P < 0.05$ , \*\*  $P < 0.01$ . BAT, Brown adipose tissue; iWAT, inguinal white adipose tissue; TA, tibialis anterior muscle; EDL, extensor digitorum longus muscle; Sol, soleus muscle; Gas, gastrocnemius muscle; Spl, spleen; Kid, kidney; Liv, liver; Hrt, heart; Lung, Lun.

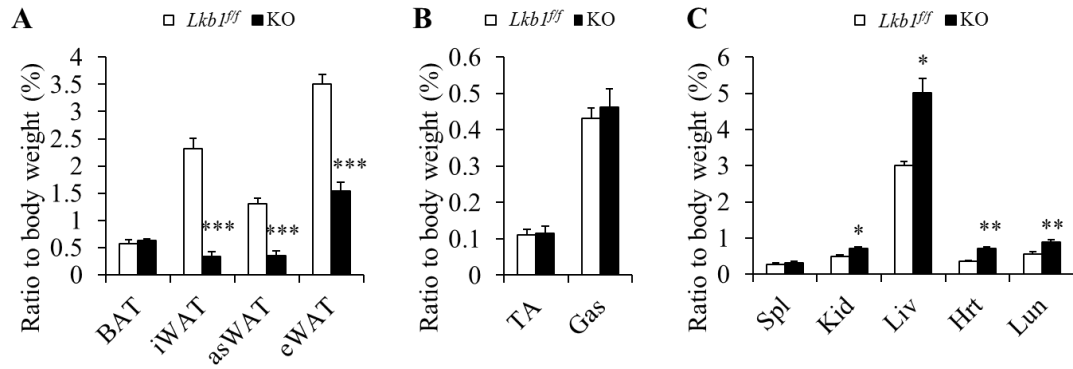

**Supplemental Figure 2: The ratios of different tissues to body weight of HFD-induced *Lkb1<sup>flox/flox</sup>* (*Lkb1<sup>ff</sup>*) and *Rosa-Lkb1* (KO) mice at 3 weeks after TMX induction.** (A-C) The ratios of adipose (A), muscle (B) and organs (C) to body weight. Error bars: S.E.M., \*  $P < 0.05$ , \*\*  $P < 0.01$ . BAT, Brown adipose tissue; iWAT, inguinal white adipose tissue; asWAT, anterior subcutaneous WAT; eWAT, epididymal WAT; TA, tibialis anterior muscle; Gas, gastrocnemius muscle; Spl, spleen; Kid, kidney; Liv, liver; Hrt, heart; Lung, Lun.

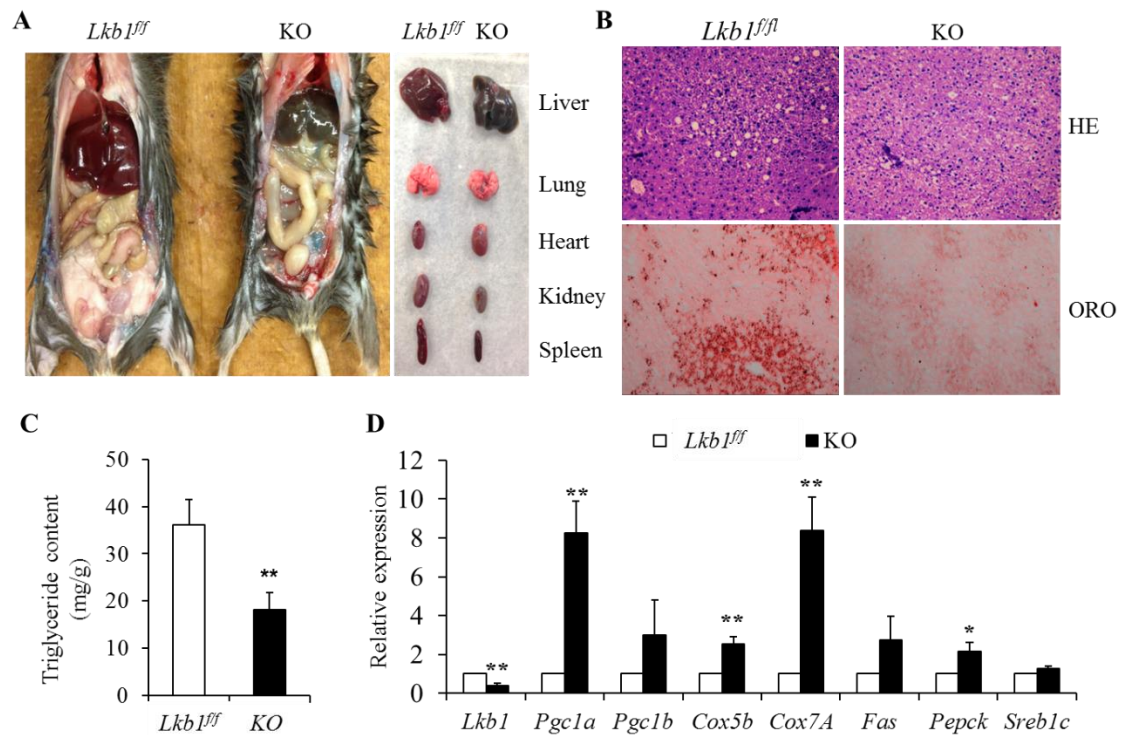

**Supplemental Figure 3: Global deletion of Lkb1 affects glycogen and lipid**

**deposition and gene expression in liver. (A)** Representatives of liver tissues from

*Lkb1<sup>flox/flox</sup>* (*Lkb1<sup>ff</sup>*) and *Rosa-Lkb1* (KO) mice at 3 weeks after tamoxifen (TMX)

induction. **(B)** Representatives images of liver sections after HE and oil red O (ORO)

staining. **(C)** The triglyceride content in liver tissues (n=4). **(D)** The mRNA levels

related genes in liver tissues from *Lkb1<sup>ff</sup>* and KO mice 3 weeks after TMX induction

(n=5). Error bars: S.E.M., \*  $P < 0.05$ , \*\*  $P < 0.01$ .
